# Supplementary material
Source: HighWire-hosted journal article supplement (https://bibliotheek.ehb.be/content/30/12/1021)
Supplement: inline-supplementary-material-4 [file inline-supplementary-material-4.pdf]

| <b>Supplementary appendix 4 Technology-related policy deviations</b>                                                       |           |                                                                                                                                                        |
|----------------------------------------------------------------------------------------------------------------------------|-----------|--------------------------------------------------------------------------------------------------------------------------------------------------------|
| <b>Data source: Observational tool</b>                                                                                     |           |                                                                                                                                                        |
| <b>Technology deviations</b>                                                                                               | <b>n*</b> | <b>Examples and Descriptions</b>                                                                                                                       |
| Low laptop battery                                                                                                         | 28        | Solved by finding another laptop which prolonged the administration time or solved by refraining from scanning.                                        |
| eMAR system froze                                                                                                          | 7         | Solved by either restarting the eMAR and having to redo the entire scanning process or waiting out for the system to unfreeze and login again.         |
| Scanner malfunctioning                                                                                                     | 2         | The barcode scanner did not operate correctly, solved by finding another scanner.                                                                      |
| Scanner not available                                                                                                      | 1         | Scanner unavailable for medication administration. Replacement obtained from another unit from a nurse that was administering medications at the time. |
| *n= the number of patients with at least one deviation<br>Abbreviations: eMAR- electronic Medication Administration Record |           |                                                                                                                                                        |
